# Supplementary material for: Detection of long non–coding RNA homology, a comparative study on alignment and alignment–free metrics
Source: PubMed Central journal article supplement (PMC6220562; doi:10.1186/s12859-018-2441-6), 2018-11-06

# Human-Mouse

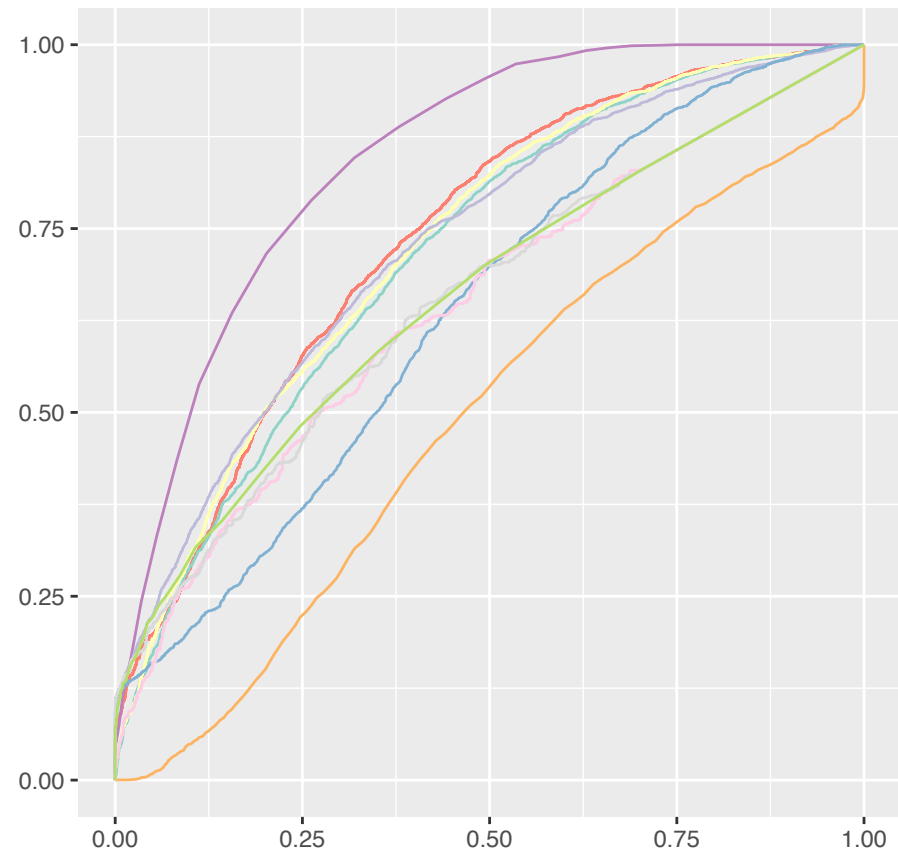

# Mouse-Zebrafish

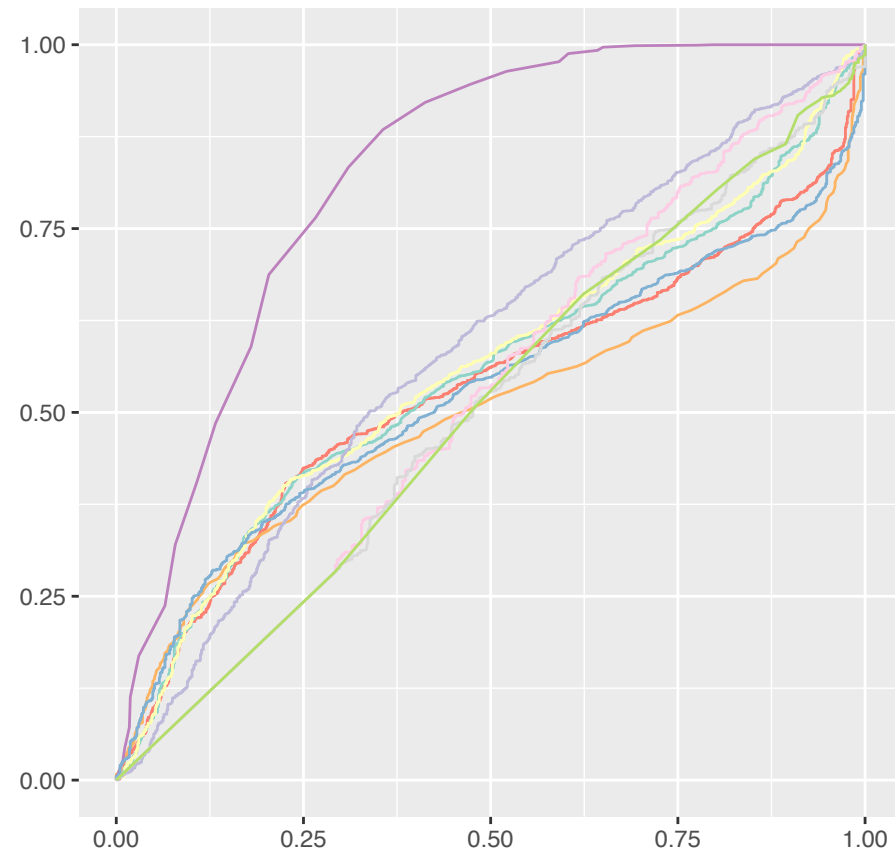

# Human-Zebrafish

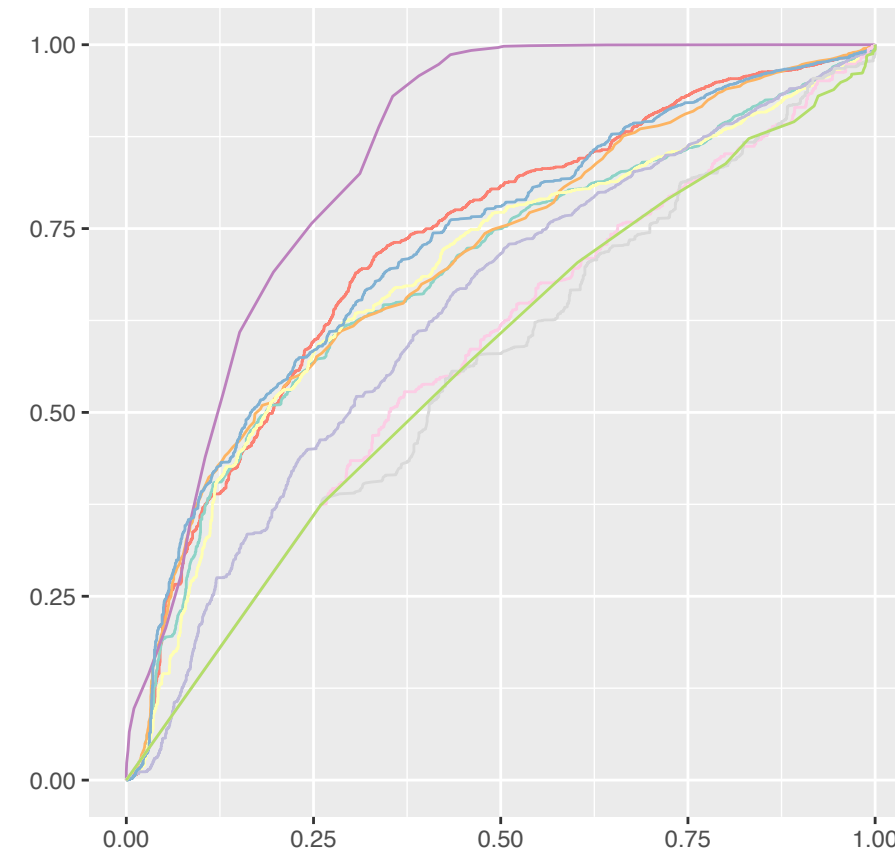

## Promoter

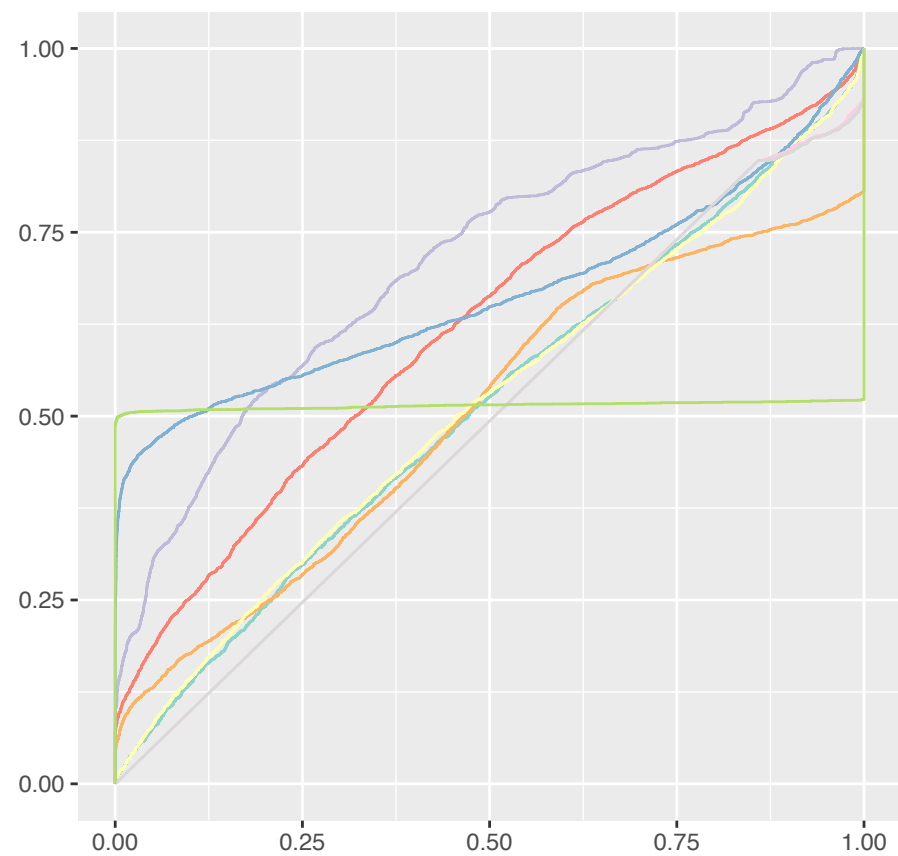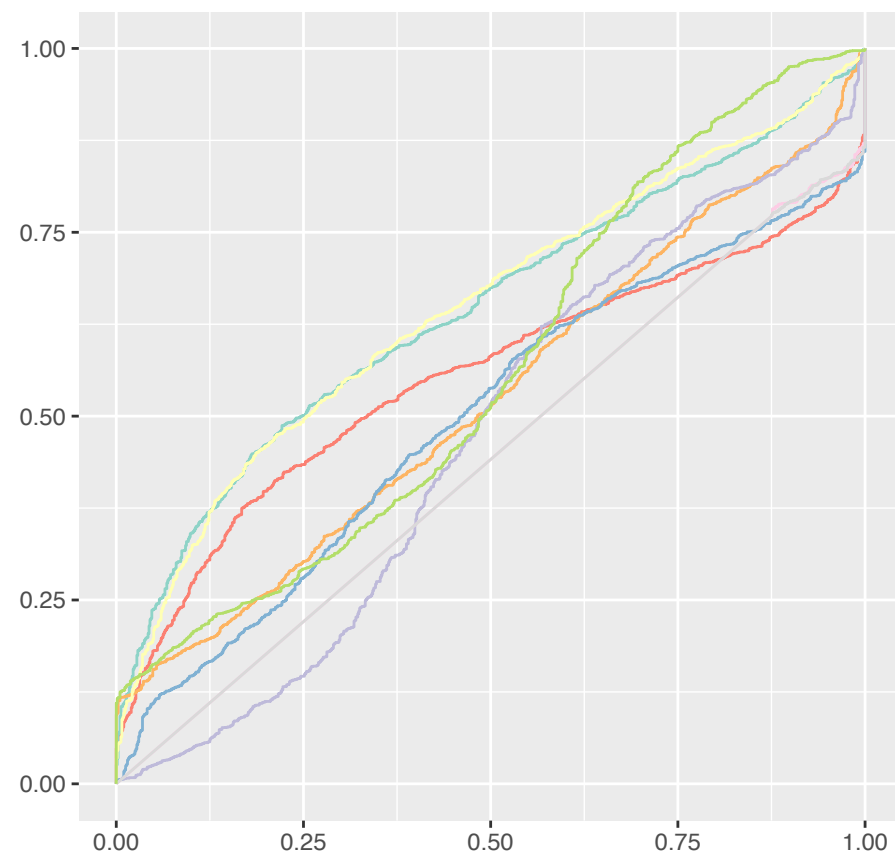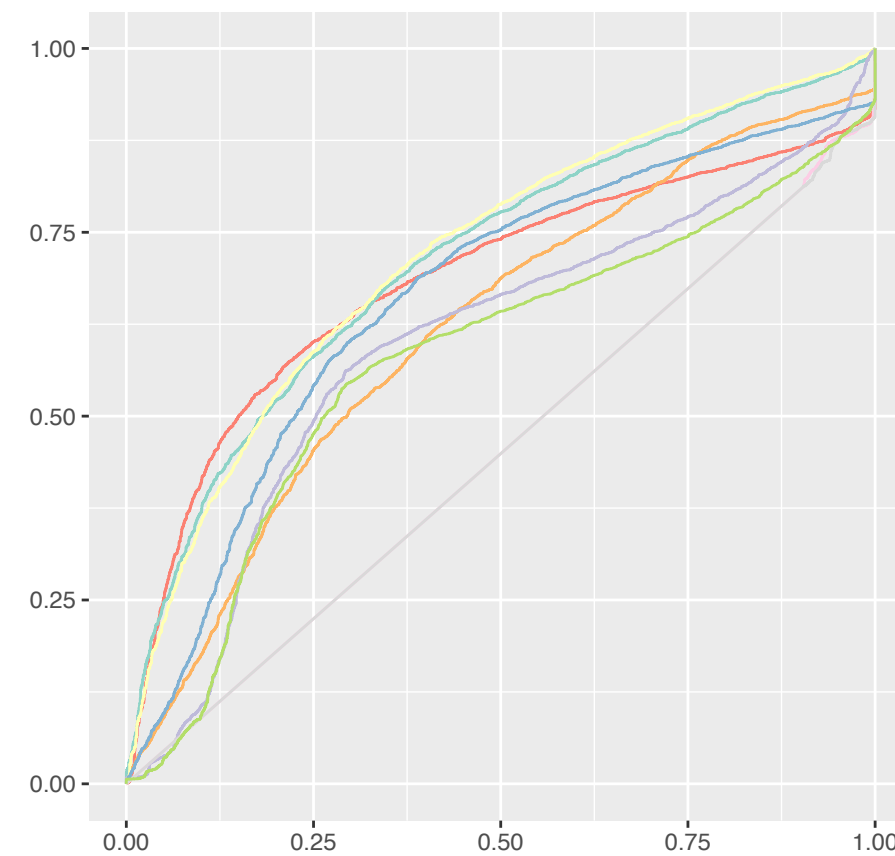

## Transcript

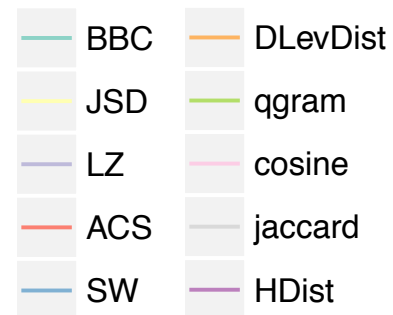

Supplement: 12859_2018_2441_MOESM3_ESM.pdf [file 12859_2018_2441_MOESM3_ESM.pdf]
