# Supplementary material for: Detection of long non–coding RNA homology, a comparative study on alignment and alignment–free metrics
Source: Springer Nature journal article supplement (doi:10.1186/s12859-018-2441-6), 2018-11-06

Human-Mouse

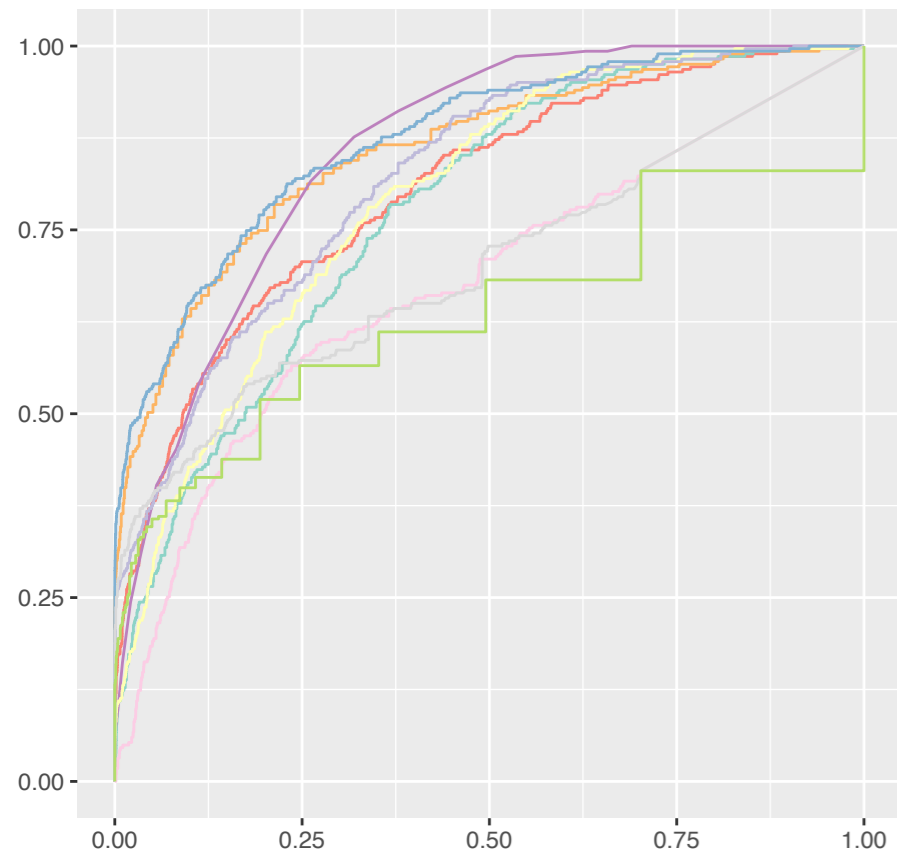

Mouse-Zebrafish

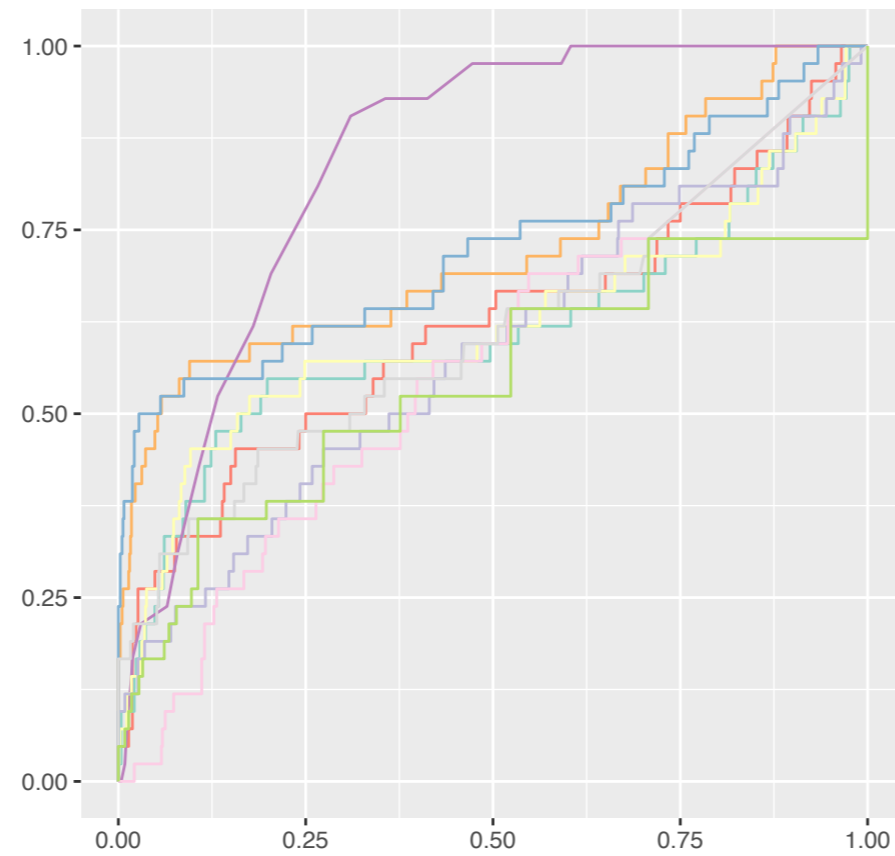

Human-Zebrafish

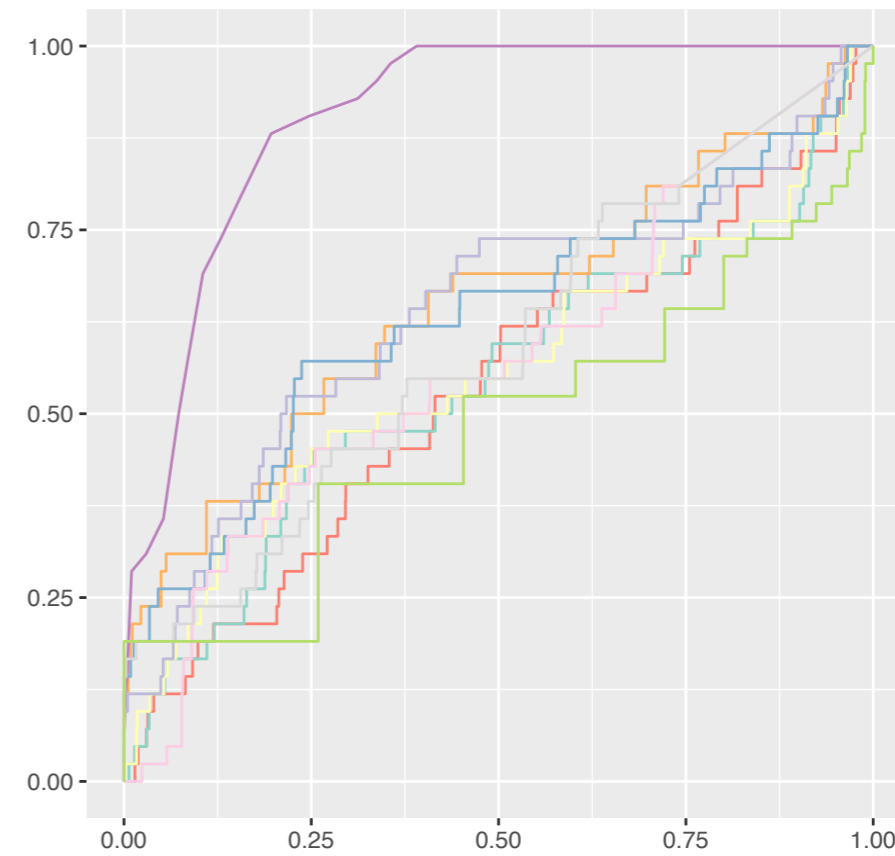

Promoter

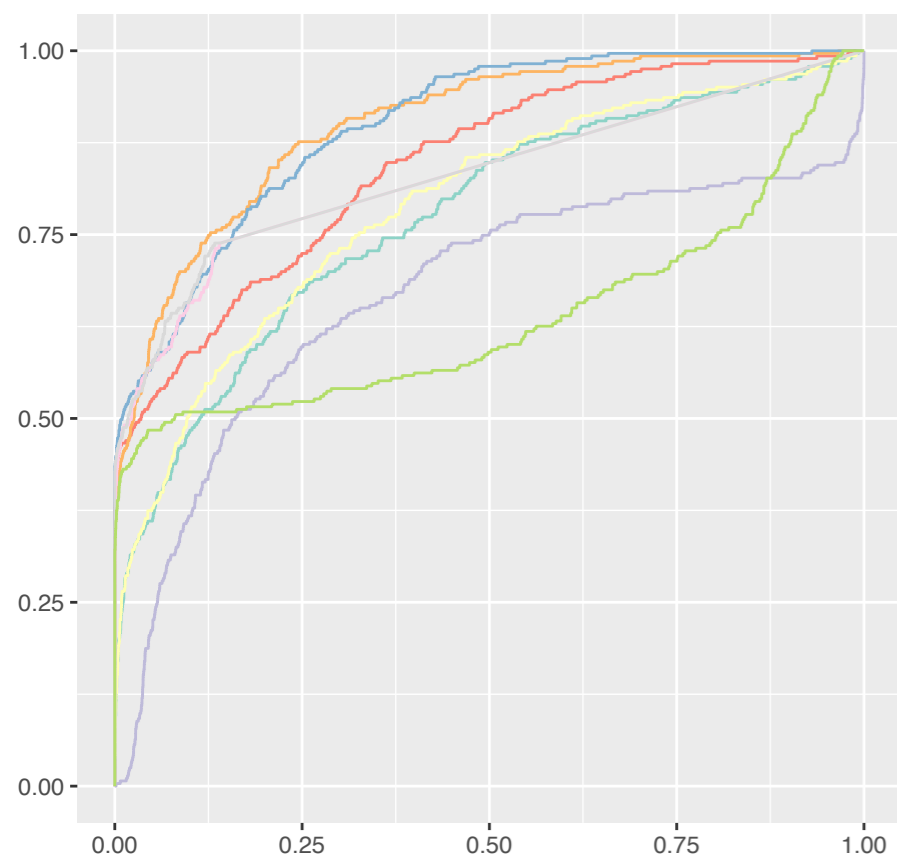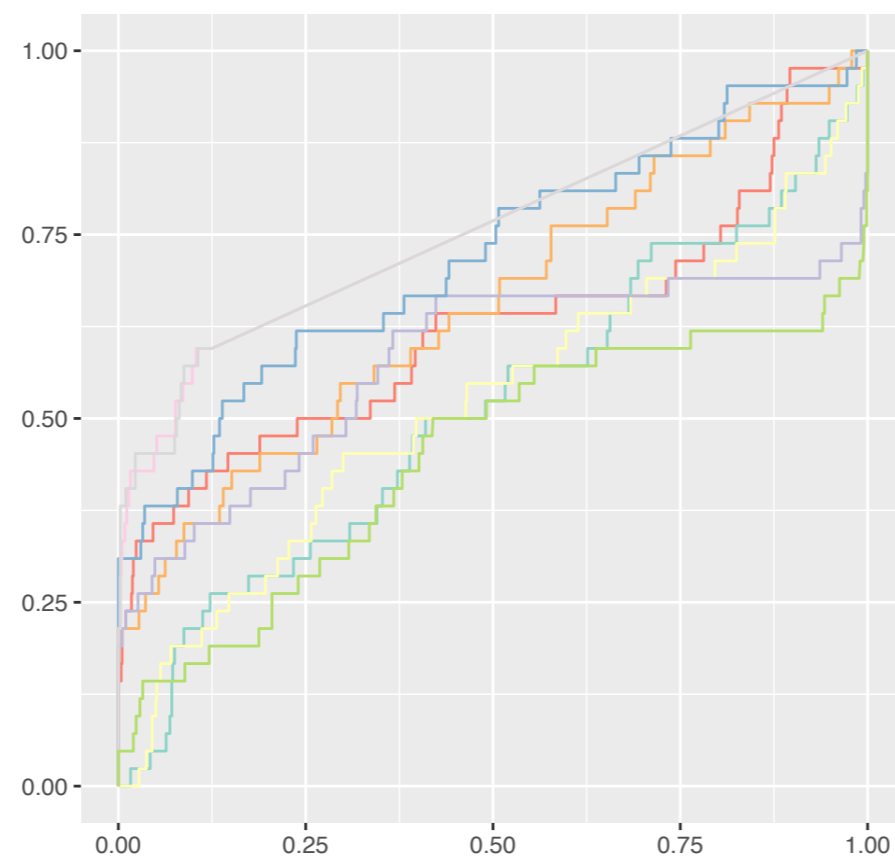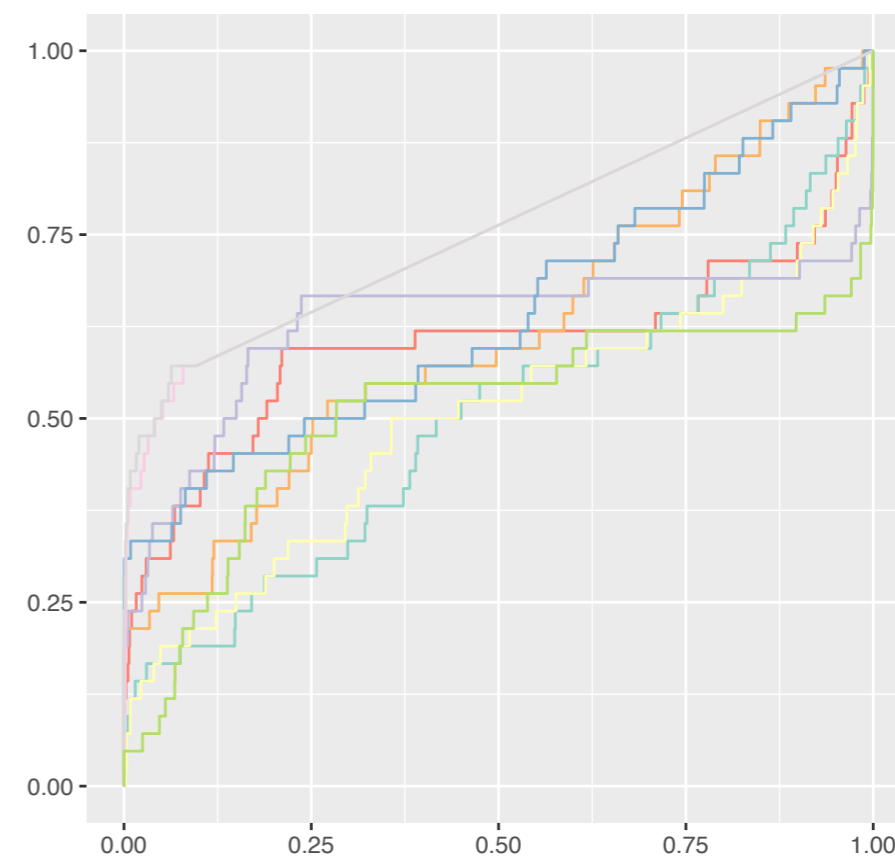

Transcript

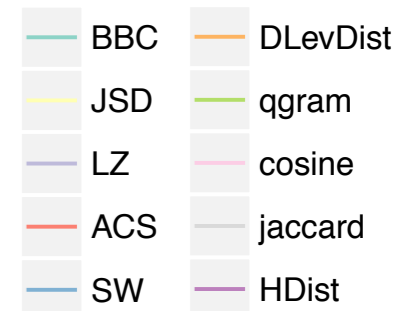

Supplement: MOESM2 [file 12859_2018_2441_MOESM2_ESM.pdf]
