# Supplementary material for: Detection of long non–coding RNA homology, a comparative study on alignment and alignment–free metrics
Source: BMC Bioinformatics. 2018 Nov 6;19:407. doi: 10.1186/s12859-018-2441-6 (PMC6220562; doi:10.1186/s12859-018-2441-6)
Supplement: Supplementary file 4 — Additional Table 1. Manually curated gold–standard. Experimentally validated lncRNA homologs for the considered species. (XLSX 13 kb) [file 12859_2018_2441_MOESM4_ESM.xlsx]

## Sheet: Foglio1
Human-Mouse
Species 1				Species 2
GeneName	ENSID	Biotype	GeneName	ENSID	Biotype	References
AIRN	ENSG00000268257	antisense	Airn	ENSMUSG00000078247	antisense	18789384, 19008856
DLX6-AS1	ENSG00000231764	antisense	Dlx6os1	ENSMUSG00000090063	antisense	24089468, 16705037, 18202870, 15183307, 15376329
EMX2OS	ENSG00000229847	antisense	Emx2os	ENSMUSG00000087095	antisense	12573261
FENDRR	ENSG00000268388	lincRNA	Fendrr	ENSMUSG00000097336	lincRNA	24381249, 23369715, 19571010, 23034409
FTX	ENSG00000230590	lincRNA	Ftx	ENSMUSG00000086370	lincRNA	12045143, 21254562, 21118898
HOTAIR	ENSG00000228630	antisense	Hotair	ENSMUSG00000086903	lincRNA	17604720, 17604716, 21637793, 21862635
HOTTIP	ENSG00000243766	antisense	Hottip	ENSMUSG00000055408	lincRNA	21423168, 17451645
HOXA-AS3	ENSG00000254369	antisense	Hoxaas3	ENSMUSG00000085696	antisense	14702039
JPX	ENSG00000225470	lincRNA	Jpx	ENSMUSG00000097571	lincRNA	21254562
KCNQ1OT1	ENSG00000269821	antisense	Kcnq1ot1	ENSMUSG00000101609	antisense	10220444, 12772698
LINC-PINT	ENSG00000231721	antisense	Lincpint	ENSMUSG00000044471	lincRNA	24070194, 24381249
LINC00461	ENSG00000245526	lincRNA	C130071C03Rik	ENSMUSG00000050334	lincRNA	12477932, 14702039, 25209608
MALAT1	ENSG00000251562	lincRNA	Malat1	ENSMUSG00000092341	lincRNA	12970751, 22560368, 17270048, 20729808
MEG3	ENSG00000214548	lincRNA	Meg3	ENSMUSG00000021268	lincRNA	10759892, 23790166
MIAT	ENSG00000225783	lincRNA	Miat	ENSMUSG00000097767	lincRNA	17066261, 23628989, 20459797
NEAT1	ENSG00000245532	lincRNA	Neat1	ENSMUSG00000092274	lincRNA	9253601, 9858482, 12565840, 17270048
PVT1	ENSG00000249859	lincRNA	Pvt1	ENSMUSG00000097039	lincRNA	17503467, 23801869
TUG1	ENSG00000253352	antisense	Tug1	ENSMUSG00000056579	antisense	15797018, 22961206, 23801869, 24381249
XIST	ENSG00000229807	lincRNA	Xist	ENSMUSG00000086503	lincRNA	1985261, 2034279
ZFAS1	ENSG00000177410	antisense	1500012F01Rik	ENSMUSG00000074578	antisense	21460236
MEG8	ENSG00000258399	lincRNA	Rian	ENSMUSG00000097451	lincRNA	12045206, 1750765
GAS5	ENSG00000234741	lincRNA	Gas5	ENSMUSG00000053332	lincRNA	16705037
SOX2-OT	ENSG00000242808	sense overlapping	Sox2ot	ENSMUSG00000105265	sense overlapping	19767420
OIP5-AS1	ENSG00000247556	antisense	1700020I14Rik	ENSMUSG00000085438	lincRNA	22196729, 21267068
TUNAR	ENSG00000250366	lincRNA	Tunar	ENSMUSG00000097929	lincRNA	22196729, 24530304
GNAS-AS1	ENSG00000235590	antisense	Nespas	ENSMUSG00000086537	antisense	16462745, 11056047
MEG9	ENSG00000223403	lincRNA	Mirg	ENSMUSG00000097391	lincRNA	19194500
HOXA11-AS	ENSG00000240990	antisense	Hoxa11os	ENSMUSG00000086427	antisense	9745033
OTX2-AS1	ENSG00000248550	lincRNA	Otx2os1	ENSMUSG00000098682	lincRNA	15703187
JPX	ENSG00000225470	lincRNA	Jpx	ENSMUSG00000097571	lincRNA	12045143
LINCMD1	ENSG00000225613	lincRNA	Gm28653	ENSMUSG00000099906	lincRNA	22000014
H19	ENSG00000130600	lincRNA	H19	ENSMUSG00000000031	lincRNA	18794369
SNHG6	ENSG00000245910	lincRNA	Snhg6	ENSMUSG00000098234	lincRNA	16226852
TSIX	ENSG00000270641	lincRNA	Tsix	ENSMUSG00000085715	antisense	10192391
TUG1	ENSG00000253352	antisense	Tug1	ENSMUSG00000056579	antisense	15797018
ZEB2-AS1	ENSG00000238057	antisense	Zeb2os	ENSMUSG00000052248	antisense	13679026, 18347095
ZFHX2-AS1	ENSG00000157306	antisense	Zfhx2os	ENSMUSG00000093452	antisense	16257534
DLEU2	ENSG00000231607	antisense	Dleu2	ENSMUSG00000097589	lincRNA	15188451
MIR143HG	ENSG00000249669	lincRNA	Mir143hg	ENSMUSG00000097324	lincRNA	26423156
Mouse-Zebrafish
Species 1				Species 2
GeneName	ENSID	Biotype	GeneName	ENSID	Biotype	References
1700020I14Rik	ENSMUSG00000085438	lincRNA	si:dkey-71p21.9	ENSDARG00000093456	lincRNA	22196729, 21267068
Sox2ot	ENSMUSG00000105265	sense overlapping	si:ch73-334e23.1	ENSDARG00000095844	sense overlapping	19767420
Dlx6os1	ENSMUSG00000090063	antisense	si:ch73-351f10.4	ENSDARG00000101648	sense overlapping	24089468, 16705037, 18202870, 15183307, 15376329
Gas5	ENSMUSG00000053332	lincRNA	gas5	ENSDARG00000092337	lincRNA	20124551, 21908402
Tunar	ENSMUSG00000097929	lincRNA	si:dkey-11a7.3	ENSDARG00000097706	antisense	24530304, 22196729
Gm26749	ENSMUSG00000097546	lincRNA	si:dkey-11a7.3	ENSDARG00000097706	antisense	22196729, 24530304
Human-Zebrafish
Species 1				Species 2
GeneName	ENSID	Biotype	GeneName	ENSID	Biotype	References
OIP5-AS1	ENSG00000247556	antisense	si:dkey-71p21.9	ENSDARG00000093456	lincRNA	22196729 26578588
BIRC6-AS2	ENSG00000279897	antisense	si:dkey-11a7.3	ENSDARG00000097706	antisense	22196729, 24530304
TUNAR	ENSG00000250366	lincRNA	si:dkey-11a7.3	ENSDARG00000097706	antisense	22196729, 24530304
SOX2-OT	ENSG00000242808	sense overlapping	si:ch73-334e23.1	ENSDARG00000095844	sense overlapping	19767420
GAS5	ENSG00000234741	lincRNA	gas5	ENSDARG00000092337	lincRNA	21908402
MALAT1	ENSG00000251562	lincRNA	malat1	ENSDARG00000099970	lincRNA	22196729
