# Supplementary material for: Detection of long non–coding RNA homology, a comparative study on alignment and alignment–free metrics
Source: BMC Bioinformatics. 2018 Nov 6;19:407. doi: 10.1186/s12859-018-2441-6 (PMC6220562; doi:10.1186/s12859-018-2441-6)
Supplement: Supplementary file 5 — Additional Table 2. GO biological process enriched terms. DAVID results for GO enrichment analysis of flanking proteins of Zebrafish lncRNA predicted to be homologous in Human (Sheet 1), Mouse (Sheet 2) and of lncRNA overlapping the conserved elements in Zebrafish (Sheet 3). (XLSX 21 kb) [file 12859_2018_2441_MOESM5_ESM.xlsx]

## Sheet: Human-Zebrafish
Human-Zebrafish
GO_BP Term	Count	p-value	Genes	List.Total	Pop.Hits	Pop.Total
regulation of RNA metabolic process	91	2.89097e-06	ENSDARG00000101637, ENSDARG00000087074, ENSDARG00000002411, ENSDARG00000035732, ENSDARG00000013615, ENSDARG00000079949, ENSDARG00000058008, ENSDARG00000056130, ENSDARG00000055750, ENSDARG00000101115, ENSDARG00000055752, ENSDARG00000070339, ENSDARG00000002933, ENSDARG00000069327, ENSDARG00000054323, ENSDARG00000013441, ENSDARG00000052695, ENSDARG00000052654, ENSDARG00000062361, ENSDARG00000036100,…	457	1834	14912
regulation of transcription, DNA-templated	88	6.19117e-06	ENSDARG00000101637, ENSDARG00000087074, ENSDARG00000002411, ENSDARG00000035732, ENSDARG00000013615, ENSDARG00000079949, ENSDARG00000058008, ENSDARG00000056130, ENSDARG00000055750, ENSDARG00000101115, ENSDARG00000055752, ENSDARG00000070339, ENSDARG00000002933, ENSDARG00000069327, ENSDARG00000054323, ENSDARG00000013441, ENSDARG00000052695, ENSDARG00000052654, ENSDARG00000062361, ENSDARG00000036100,…	457	1788	14912
regulation of gene expression	95	3.47601e-05	ENSDARG00000101637, ENSDARG00000087074, ENSDARG00000002411, ENSDARG00000035732, ENSDARG00000013615, ENSDARG00000079949, ENSDARG00000058008, ENSDARG00000056130, ENSDARG00000055750, ENSDARG00000101115, ENSDARG00000055752, ENSDARG00000070339, ENSDARG00000002933, ENSDARG00000054323, ENSDARG00000069327, ENSDARG00000013441, ENSDARG00000052695, ENSDARG00000052654, ENSDARG00000062361, ENSDARG00000036100,…	457	2063	14912
nervous system development	68	6.01108e-05	ENSDARG00000058008, ENSDARG00000056130, ENSDARG00000015053, ENSDARG00000098769, ENSDARG00000055752, ENSDARG00000002933, ENSDARG00000077489, ENSDARG00000010420, ENSDARG00000105088, ENSDARG00000070047, ENSDARG00000011989, ENSDARG00000054137, ENSDARG00000091029, ENSDARG00000029157, ENSDARG00000044827, ENSDARG00000058821, ENSDARG00000008174, ENSDARG00000073978, ENSDARG00000020134, ENSDARG00000004714,…	457	1360	14912
system development	119	0.000210509	ENSDARG00000087074, ENSDARG00000101637, ENSDARG00000056130, ENSDARG00000008735, ENSDARG00000055752, ENSDARG00000002933, ENSDARG00000013441, ENSDARG00000105185, ENSDARG00000070081, ENSDARG00000011989, ENSDARG00000075949, ENSDARG00000008573, ENSDARG00000007412, ENSDARG00000091029, ENSDARG00000031761, ENSDARG00000036670, ENSDARG00000058821, ENSDARG00000008174, ENSDARG00000075549, ENSDARG00000004714,…	457	2855	14912
nucleobase-containing compound biosynthetic process	94	0.000306963	ENSDARG00000101637, ENSDARG00000087074, ENSDARG00000002411, ENSDARG00000035732, ENSDARG00000013615, ENSDARG00000079949, ENSDARG00000058008, ENSDARG00000056130, ENSDARG00000055750, ENSDARG00000101115, ENSDARG00000055752, ENSDARG00000070339, ENSDARG00000002933, ENSDARG00000054323, ENSDARG00000069327, ENSDARG00000013441, ENSDARG00000052695, ENSDARG00000052654, ENSDARG00000062361, ENSDARG00000036100,…	457	2160	14912
single-multicellular organism process	143	0.000412005	ENSDARG00000087074, ENSDARG00000101637, ENSDARG00000056130, ENSDARG00000008735, ENSDARG00000023578, ENSDARG00000055752, ENSDARG00000002933, ENSDARG00000013441, ENSDARG00000105185, ENSDARG00000070081, ENSDARG00000036100, ENSDARG00000011989, ENSDARG00000075949, ENSDARG00000008573, ENSDARG00000007412, ENSDARG00000091029, ENSDARG00000031761, ENSDARG00000036670, ENSDARG00000058821, ENSDARG00000100312,…	457	3617	14912
transcription from RNA polymerase II promoter	30	0.000513721	ENSDARG00000101637, ENSDARG00000002411, ENSDARG00000079949, ENSDARG00000070864, ENSDARG00000078348, ENSDARG00000056130, ENSDARG00000018260, ENSDARG00000055752, ENSDARG00000007824, ENSDARG00000036987, ENSDARG00000034195, ENSDARG00000062361, ENSDARG00000074378, ENSDARG00000078592, ENSDARG00000031761, ENSDARG00000100312, ENSDARG00000055381, ENSDARG00000006110, ENSDARG00000042180, ENSDARG00000086459,…	457	488	14912
RNA metabolic process	105	0.000528024	ENSDARG00000011125, ENSDARG00000087074, ENSDARG00000101637, ENSDARG00000002411, ENSDARG00000079949, ENSDARG00000061100, ENSDARG00000056130, ENSDARG00000055750, ENSDARG00000055752, ENSDARG00000002933, ENSDARG00000069327, ENSDARG00000013441, ENSDARG00000052654, ENSDARG00000076560, ENSDARG00000036100, ENSDARG00000062361, ENSDARG00000011989, ENSDARG00000091029, ENSDARG00000031761, ENSDARG00000004328,…	457	2511	14912
developmental process	147	0.000576262	ENSDARG00000087074, ENSDARG00000101637, ENSDARG00000056130, ENSDARG00000008735, ENSDARG00000023578, ENSDARG00000055752, ENSDARG00000002933, ENSDARG00000013441, ENSDARG00000105185, ENSDARG00000070081, ENSDARG00000036100, ENSDARG00000011989, ENSDARG00000075949, ENSDARG00000008573, ENSDARG00000007412, ENSDARG00000091029, ENSDARG00000031761, ENSDARG00000036670, ENSDARG00000058821, ENSDARG00000100312,…	457	3765	14912
anatomical structure morphogenesis	83	0.000647364	ENSDARG00000101637, ENSDARG00000058008, ENSDARG00000056130, ENSDARG00000045748, ENSDARG00000098769, ENSDARG00000023578, ENSDARG00000013441, ENSDARG00000077489, ENSDARG00000070081, ENSDARG00000105088, ENSDARG00000070047, ENSDARG00000011989, ENSDARG00000075949, ENSDARG00000008573, ENSDARG00000054137, ENSDARG00000007412, ENSDARG00000031761, ENSDARG00000036670, ENSDARG00000023290, ENSDARG00000058821,…	457	1895	14912
anatomical structure development	145	0.000703918	ENSDARG00000087074, ENSDARG00000101637, ENSDARG00000056130, ENSDARG00000008735, ENSDARG00000023578, ENSDARG00000055752, ENSDARG00000002933, ENSDARG00000013441, ENSDARG00000105185, ENSDARG00000070081, ENSDARG00000036100, ENSDARG00000011989, ENSDARG00000075949, ENSDARG00000008573, ENSDARG00000007412, ENSDARG00000091029, ENSDARG00000031761, ENSDARG00000036670, ENSDARG00000058821, ENSDARG00000100312,…	457	3721	14912
neurogenesis	45	0.000725731	ENSDARG00000015053, ENSDARG00000070864, ENSDARG00000056130, ENSDARG00000098769, ENSDARG00000070769, ENSDARG00000101209, ENSDARG00000011600, ENSDARG00000034195, ENSDARG00000077489, ENSDARG00000074073, ENSDARG00000010420, ENSDARG00000105088, ENSDARG00000071107, ENSDARG00000011533, ENSDARG00000011989, ENSDARG00000070047, ENSDARG00000074535, ENSDARG00000031783, ENSDARG00000054137, ENSDARG00000044827,…	457	871	14912
multicellular organismal process	156	0.000866685	ENSDARG00000087074, ENSDARG00000101637, ENSDARG00000056130, ENSDARG00000008735, ENSDARG00000023578, ENSDARG00000055752, ENSDARG00000002933, ENSDARG00000013441, ENSDARG00000105185, ENSDARG00000070081, ENSDARG00000036100, ENSDARG00000011989, ENSDARG00000075949, ENSDARG00000008573, ENSDARG00000007412, ENSDARG00000091029, ENSDARG00000031761, ENSDARG00000036670, ENSDARG00000058821, ENSDARG00000100312,…	457	4074	14912
nucleic acid metabolic process	110	0.00449552	ENSDARG00000011125, ENSDARG00000087074, ENSDARG00000101637, ENSDARG00000002411, ENSDARG00000079949, ENSDARG00000061100, ENSDARG00000056130, ENSDARG00000055750, ENSDARG00000055752, ENSDARG00000002933, ENSDARG00000069327, ENSDARG00000013441, ENSDARG00000052654, ENSDARG00000076560, ENSDARG00000036100, ENSDARG00000062361, ENSDARG00000011989, ENSDARG00000091029, ENSDARG00000031761, ENSDARG00000004328,…	457	2827	14912
tissue development	53	0.00909133	ENSDARG00000016153, ENSDARG00000056130, ENSDARG00000045748, ENSDARG00000023578, ENSDARG00000013441, ENSDARG00000070081, ENSDARG00000091029, ENSDARG00000036670, ENSDARG00000023290, ENSDARG00000058821, ENSDARG00000075549, ENSDARG00000104039, ENSDARG00000006110, ENSDARG00000069378, ENSDARG00000036471, ENSDARG00000088590, ENSDARG00000077353, ENSDARG00000030494, ENSDARG00000100584, ENSDARG00000070425,…	457	1220	14912

## Sheet: Mouse-Zebrafish
Mouse-Zebrafish
GO_BP Term	Count	p-value	Genes	List.Total	Pop.Hits	Pop.Total
system development	111	3.40982e-05	ENSDARG00000020541, ENSDARG00000045166, ENSDARG00000008735, ENSDARG00000053301, ENSDARG00000032578, ENSDARG00000032617, ENSDARG00000002933, ENSDARG00000105185, ENSDARG00000070081, ENSDARG00000011989, ENSDARG00000045880, ENSDARG00000075949, ENSDARG00000008573, ENSDARG00000007412, ENSDARG00000103311, ENSDARG00000091029, ENSDARG00000100020, ENSDARG00000036670, ENSDARG00000058821, ENSDARG00000037889,…	404	2855	14912
regulation of RNA metabolic process	78	4.73132e-05	ENSDARG00000007944, ENSDARG00000002411, ENSDARG00000058008, ENSDARG00000053301, ENSDARG00000032578, ENSDARG00000070339, ENSDARG00000002933, ENSDARG00000069327, ENSDARG00000052695, ENSDARG00000017821, ENSDARG00000011989, ENSDARG00000091029, ENSDARG00000007413, ENSDARG00000088157, ENSDARG00000100312, ENSDARG00000021032, ENSDARG00000006110, ENSDARG00000014746, ENSDARG00000004714, ENSDARG00000041430,…	404	1834	14912
nervous system development	61	9.78327e-05	ENSDARG00000058008, ENSDARG00000015053, ENSDARG00000098769, ENSDARG00000053301, ENSDARG00000032578, ENSDARG00000032617, ENSDARG00000002933, ENSDARG00000077489, ENSDARG00000105088, ENSDARG00000011989, ENSDARG00000045880, ENSDARG00000044827, ENSDARG00000091029, ENSDARG00000058821, ENSDARG00000037889, ENSDARG00000038363, ENSDARG00000021032, ENSDARG00000014746, ENSDARG00000073978, ENSDARG00000004714,…	404	1360	14912
regulation of transcription, DNA-templated	75	0.000110301	ENSDARG00000007944, ENSDARG00000002411, ENSDARG00000058008, ENSDARG00000053301, ENSDARG00000032578, ENSDARG00000070339, ENSDARG00000002933, ENSDARG00000069327, ENSDARG00000052695, ENSDARG00000017821, ENSDARG00000011989, ENSDARG00000091029, ENSDARG00000007413, ENSDARG00000088157, ENSDARG00000100312, ENSDARG00000021032, ENSDARG00000006110, ENSDARG00000004714, ENSDARG00000041430, ENSDARG00000036471,…	404	1788	14912
anatomical structure morphogenesis	78	0.000142267	ENSDARG00000020541, ENSDARG00000058008, ENSDARG00000045748, ENSDARG00000098769, ENSDARG00000032617, ENSDARG00000077489, ENSDARG00000070081, ENSDARG00000017821, ENSDARG00000105088, ENSDARG00000011989, ENSDARG00000075949, ENSDARG00000008573, ENSDARG00000007412, ENSDARG00000103311, ENSDARG00000100020, ENSDARG00000036670, ENSDARG00000056986, ENSDARG00000023290, ENSDARG00000088157, ENSDARG00000058821,…	404	1895	14912
developmental process	135	0.000163398	ENSDARG00000020541, ENSDARG00000045166, ENSDARG00000008735, ENSDARG00000032578, ENSDARG00000053301, ENSDARG00000032617, ENSDARG00000015611, ENSDARG00000002933, ENSDARG00000105185, ENSDARG00000070081, ENSDARG00000011989, ENSDARG00000045880, ENSDARG00000075949, ENSDARG00000008573, ENSDARG00000103311, ENSDARG00000007412, ENSDARG00000100020, ENSDARG00000091029, ENSDARG00000036670, ENSDARG00000058821,…	404	3765	14912
anatomical structure development	133	0.000219338	ENSDARG00000020541, ENSDARG00000045166, ENSDARG00000008735, ENSDARG00000032578, ENSDARG00000053301, ENSDARG00000032617, ENSDARG00000015611, ENSDARG00000002933, ENSDARG00000105185, ENSDARG00000070081, ENSDARG00000011989, ENSDARG00000045880, ENSDARG00000075949, ENSDARG00000008573, ENSDARG00000007412, ENSDARG00000103311, ENSDARG00000100020, ENSDARG00000091029, ENSDARG00000036670, ENSDARG00000058821,…	404	3721	14912
RNA metabolic process	95	0.00043817	ENSDARG00000007944, ENSDARG00000104130, ENSDARG00000002411, ENSDARG00000061100, ENSDARG00000058008, ENSDARG00000032578, ENSDARG00000053301, ENSDARG00000070339, ENSDARG00000002933, ENSDARG00000069327, ENSDARG00000052695, ENSDARG00000017821, ENSDARG00000078966, ENSDARG00000011989, ENSDARG00000091029, ENSDARG00000007413, ENSDARG00000088157, ENSDARG00000038360, ENSDARG00000100312, ENSDARG00000021032,…	404	2511	14912
regulation of gene expression	81	0.00045597	ENSDARG00000007944, ENSDARG00000002411, ENSDARG00000058008, ENSDARG00000053301, ENSDARG00000032578, ENSDARG00000070339, ENSDARG00000002933, ENSDARG00000069327, ENSDARG00000052695, ENSDARG00000009899, ENSDARG00000017821, ENSDARG00000011989, ENSDARG00000091029, ENSDARG00000007413, ENSDARG00000088157, ENSDARG00000100312, ENSDARG00000021032, ENSDARG00000006110, ENSDARG00000014746, ENSDARG00000004714,…	404	2063	14912
single-multicellular organism process	128	0.000482007	ENSDARG00000020541, ENSDARG00000045166, ENSDARG00000008735, ENSDARG00000032578, ENSDARG00000053301, ENSDARG00000032617, ENSDARG00000002933, ENSDARG00000105185, ENSDARG00000070081, ENSDARG00000011989, ENSDARG00000045880, ENSDARG00000075949, ENSDARG00000008573, ENSDARG00000007412, ENSDARG00000103311, ENSDARG00000100020, ENSDARG00000091029, ENSDARG00000036670, ENSDARG00000058821, ENSDARG00000100782,…	404	3617	14912
nucleic acid metabolic process	103	0.000871066	ENSDARG00000007944, ENSDARG00000002411, ENSDARG00000061100, ENSDARG00000053301, ENSDARG00000032578, ENSDARG00000002933, ENSDARG00000069327, ENSDARG00000104541, ENSDARG00000078966, ENSDARG00000011989, ENSDARG00000091029, ENSDARG00000007413, ENSDARG00000100312, ENSDARG00000004714, ENSDARG00000041430, ENSDARG00000036471, ENSDARG00000076891, ENSDARG00000059370, ENSDARG00000004415, ENSDARG00000073891,…	404	2827	14912
tissue development	52	0.00117014	ENSDARG00000016153, ENSDARG00000045748, ENSDARG00000053301, ENSDARG00000015611, ENSDARG00000032617, ENSDARG00000017821, ENSDARG00000070081, ENSDARG00000091029, ENSDARG00000036670, ENSDARG00000023290, ENSDARG00000056986, ENSDARG00000058821, ENSDARG00000104039, ENSDARG00000021032, ENSDARG00000006110, ENSDARG00000041430, ENSDARG00000069378, ENSDARG00000076995, ENSDARG00000036471, ENSDARG00000070617,…	404	1220	14912
neurogenesis	39	0.00243726	ENSDARG00000015053, ENSDARG00000098769, ENSDARG00000070769, ENSDARG00000027041, ENSDARG00000011600, ENSDARG00000034195, ENSDARG00000077489, ENSDARG00000105088, ENSDARG00000102004, ENSDARG00000071107, ENSDARG00000011533, ENSDARG00000011989, ENSDARG00000044827, ENSDARG00000058821, ENSDARG00000037889, ENSDARG00000038363, ENSDARG00000021032, ENSDARG00000071208, ENSDARG00000004714, ENSDARG00000041430,…	404	871	14912
multicellular organismal process	136	0.00328774	ENSDARG00000020541, ENSDARG00000008735, ENSDARG00000045166, ENSDARG00000032578, ENSDARG00000053301, ENSDARG00000032617, ENSDARG00000002933, ENSDARG00000105185, ENSDARG00000070081, ENSDARG00000011989, ENSDARG00000045880, ENSDARG00000075949, ENSDARG00000008573, ENSDARG00000103311, ENSDARG00000007412, ENSDARG00000100020, ENSDARG00000091029, ENSDARG00000036670, ENSDARG00000058821, ENSDARG00000100312,…	404	4074	14912
transcription from RNA polymerase II promoter	25	0.00357489	ENSDARG00000002411, ENSDARG00000078348, ENSDARG00000018260, ENSDARG00000053301, ENSDARG00000007824, ENSDARG00000034195, ENSDARG00000017821, ENSDARG00000040116, ENSDARG00000077987, ENSDARG00000074378, ENSDARG00000088157, ENSDARG00000055493, ENSDARG00000100312, ENSDARG00000021032, ENSDARG00000055381, ENSDARG00000006110, ENSDARG00000004714, ENSDARG00000041430, ENSDARG00000036471, ENSDARG00000073891,…	404	488	14912
nucleobase-containing compound biosynthetic process	79	0.00397812	ENSDARG00000007944, ENSDARG00000002411, ENSDARG00000058008, ENSDARG00000053301, ENSDARG00000032578, ENSDARG00000070339, ENSDARG00000002933, ENSDARG00000069327, ENSDARG00000052695, ENSDARG00000017821, ENSDARG00000011989, ENSDARG00000091029, ENSDARG00000007413, ENSDARG00000088157, ENSDARG00000100312, ENSDARG00000021032, ENSDARG00000006110, ENSDARG00000004714, ENSDARG00000041430, ENSDARG00000036471,…	404	2160	14912
cell fate commitment	11	0.00449714	ENSDARG00000017821, ENSDARG00000071107, ENSDARG00000037889, ENSDARG00000038363, ENSDARG00000018260, ENSDARG00000071208, ENSDARG00000044827, ENSDARG00000041430, ENSDARG00000102964, ENSDARG00000037677, ENSDARG00000003411	404	139	14912

## Sheet: Zebrafish phastCons element
Zebrafish phastCons element
GO_BP Term	Count	p-value	Genes	List.Total	Pop.Hits	Pop.Total
nervous system development	51	1.35207e-07	ENSDARG00000058008, ENSDARG00000015053, ENSDARG00000053301, ENSDARG00000032578, ENSDARG00000006615, ENSDARG00000034344, ENSDARG00000002933, ENSDARG00000019004, ENSDARG00000022569, ENSDARG00000045880, ENSDARG00000029157, ENSDARG00000044827, ENSDARG00000007220, ENSDARG00000037889, ENSDARG00000021032, ENSDARG00000060058, ENSDARG00000088805, ENSDARG00000020134, ENSDARG00000073978, ENSDARG00000061051,…	255	1360	14912
system development	74	0.000125252	ENSDARG00000010844, ENSDARG00000060542, ENSDARG00000058008, ENSDARG00000015053, ENSDARG00000006615, ENSDARG00000070787, ENSDARG00000053301, ENSDARG00000032578, ENSDARG00000040237, ENSDARG00000034344, ENSDARG00000002933, ENSDARG00000094729, ENSDARG00000019004, ENSDARG00000022569, ENSDARG00000076526, ENSDARG00000045880, ENSDARG00000029157, ENSDARG00000044827, ENSDARG00000033840, ENSDARG00000007220,…	255	2855	14912
neurogenesis	31	0.000187941	ENSDARG00000070864, ENSDARG00000015053, ENSDARG00000076351, ENSDARG00000101209, ENSDARG00000027041, ENSDARG00000033655, ENSDARG00000034195, ENSDARG00000074073, ENSDARG00000022569, ENSDARG00000074535, ENSDARG00000029157, ENSDARG00000044827, ENSDARG00000053569, ENSDARG00000007220, ENSDARG00000037889, ENSDARG00000021032, ENSDARG00000063663, ENSDARG00000020134, ENSDARG00000041430, ENSDARG00000061051,…	255	871	14912
single-multicellular organism process	88	0.000193066	ENSDARG00000010844, ENSDARG00000060542, ENSDARG00000058008, ENSDARG00000015053, ENSDARG00000023578, ENSDARG00000006615, ENSDARG00000070787, ENSDARG00000032578, ENSDARG00000053301, ENSDARG00000040237, ENSDARG00000034344, ENSDARG00000002933, ENSDARG00000094729, ENSDARG00000019004, ENSDARG00000022569, ENSDARG00000036100, ENSDARG00000076526, ENSDARG00000045880, ENSDARG00000098103, ENSDARG00000044827,…	255	3617	14912
anatomical structure morphogenesis	53	0.000302505	ENSDARG00000010844, ENSDARG00000058008, ENSDARG00000023578, ENSDARG00000070787, ENSDARG00000006615, ENSDARG00000040237, ENSDARG00000034344, ENSDARG00000094729, ENSDARG00000022569, ENSDARG00000033840, ENSDARG00000007220, ENSDARG00000021032, ENSDARG00000060058, ENSDARG00000020134, ENSDARG00000073978, ENSDARG00000041430, ENSDARG00000020136, ENSDARG00000069378, ENSDARG00000091576, ENSDARG00000009418,…	255	1895	14912
multicellular organismal process	94	0.000694032	ENSDARG00000010844, ENSDARG00000060542, ENSDARG00000058008, ENSDARG00000015053, ENSDARG00000023578, ENSDARG00000006615, ENSDARG00000070787, ENSDARG00000032578, ENSDARG00000053301, ENSDARG00000040237, ENSDARG00000034344, ENSDARG00000002933, ENSDARG00000094729, ENSDARG00000019004, ENSDARG00000022569, ENSDARG00000058820, ENSDARG00000036100, ENSDARG00000076526, ENSDARG00000045880, ENSDARG00000098103,…	255	4074	14912
developmental process	88	0.000774812	ENSDARG00000010844, ENSDARG00000060542, ENSDARG00000058008, ENSDARG00000015053, ENSDARG00000023578, ENSDARG00000006615, ENSDARG00000070787, ENSDARG00000032578, ENSDARG00000053301, ENSDARG00000040237, ENSDARG00000034344, ENSDARG00000002933, ENSDARG00000094729, ENSDARG00000019004, ENSDARG00000022569, ENSDARG00000036100, ENSDARG00000076526, ENSDARG00000045880, ENSDARG00000029157, ENSDARG00000044827,…	255	3765	14912
anatomical structure development	87	0.000841059	ENSDARG00000010844, ENSDARG00000060542, ENSDARG00000058008, ENSDARG00000015053, ENSDARG00000023578, ENSDARG00000006615, ENSDARG00000070787, ENSDARG00000032578, ENSDARG00000053301, ENSDARG00000040237, ENSDARG00000034344, ENSDARG00000002933, ENSDARG00000094729, ENSDARG00000019004, ENSDARG00000022569, ENSDARG00000036100, ENSDARG00000076526, ENSDARG00000045880, ENSDARG00000029157, ENSDARG00000044827,…	255	3721	14912
regulation of RNA metabolic process	49	0.0015075	ENSDARG00000035732, ENSDARG00000058008, ENSDARG00000105144, ENSDARG00000053301, ENSDARG00000032578, ENSDARG00000006615, ENSDARG00000040237, ENSDARG00000014324, ENSDARG00000002933, ENSDARG00000022569, ENSDARG00000036100, ENSDARG00000029157, ENSDARG00000098103, ENSDARG00000007413, ENSDARG00000021032, ENSDARG00000060058, ENSDARG00000041430, ENSDARG00000045695, ENSDARG00000001549, ENSDARG00000059483,…	255	1834	14912
regulation of transcription, DNA-templated	48	0.00155562	ENSDARG00000035732, ENSDARG00000058008, ENSDARG00000018260, ENSDARG00000070864, ENSDARG00000105144, ENSDARG00000014309, ENSDARG00000006615, ENSDARG00000053301, ENSDARG00000032578, ENSDARG00000040237, ENSDARG00000014324, ENSDARG00000036987, ENSDARG00000002933, ENSDARG00000029830, ENSDARG00000034195, ENSDARG00000022569, ENSDARG00000075560, ENSDARG00000077987, ENSDARG00000036100, ENSDARG00000011703,…	255	1788	14912
cell fate commitment	9	0.00262824	ENSDARG00000037889, ENSDARG00000018260, ENSDARG00000044827, ENSDARG00000041430, ENSDARG00000102964, ENSDARG00000004023, ENSDARG00000040926, ENSDARG00000003411, ENSDARG00000022569	255	139	14912
RNA metabolic process	60	0.00512834	ENSDARG00000035732, ENSDARG00000058008, ENSDARG00000105144, ENSDARG00000053301, ENSDARG00000032578, ENSDARG00000006615, ENSDARG00000040237, ENSDARG00000014324, ENSDARG00000002933, ENSDARG00000022569, ENSDARG00000036100, ENSDARG00000076526, ENSDARG00000007413, ENSDARG00000029157, ENSDARG00000098103, ENSDARG00000038360, ENSDARG00000021032, ENSDARG00000060058, ENSDARG00000075368, ENSDARG00000041430,…	255	2511	14912
nucleobase-containing compound biosynthetic process	53	0.00552506	ENSDARG00000035732, ENSDARG00000058008, ENSDARG00000105144, ENSDARG00000053301, ENSDARG00000032578, ENSDARG00000006615, ENSDARG00000040237, ENSDARG00000014324, ENSDARG00000002933, ENSDARG00000022569, ENSDARG00000036100, ENSDARG00000029157, ENSDARG00000098103, ENSDARG00000007413, ENSDARG00000021032, ENSDARG00000060058, ENSDARG00000041430, ENSDARG00000045695, ENSDARG00000061509, ENSDARG00000001549,…	255	2160	14912
regulation of gene expression	51	0.00576653	ENSDARG00000035732, ENSDARG00000058008, ENSDARG00000105144, ENSDARG00000053301, ENSDARG00000032578, ENSDARG00000006615, ENSDARG00000040237, ENSDARG00000014324, ENSDARG00000002933, ENSDARG00000022569, ENSDARG00000036100, ENSDARG00000029157, ENSDARG00000098103, ENSDARG00000007413, ENSDARG00000021032, ENSDARG00000060058, ENSDARG00000041430, ENSDARG00000045695, ENSDARG00000001549, ENSDARG00000059483,…	255	2063	14912
nucleic acid metabolic process	65	0.0080538	ENSDARG00000035732, ENSDARG00000058008, ENSDARG00000105144, ENSDARG00000053301, ENSDARG00000032578, ENSDARG00000006615, ENSDARG00000040237, ENSDARG00000014324, ENSDARG00000002933, ENSDARG00000022569, ENSDARG00000036100, ENSDARG00000076526, ENSDARG00000007413, ENSDARG00000029157, ENSDARG00000098103, ENSDARG00000038360, ENSDARG00000021032, ENSDARG00000060058, ENSDARG00000075368, ENSDARG00000041430,…	255	2827	14912
tissue development	33	0.00948141	ENSDARG00000060542, ENSDARG00000018260, ENSDARG00000014309, ENSDARG00000023578, ENSDARG00000006615, ENSDARG00000053301, ENSDARG00000101209, ENSDARG00000052846, ENSDARG00000036987, ENSDARG00000034344, ENSDARG00000094729, ENSDARG00000029830, ENSDARG00000019004, ENSDARG00000022569, ENSDARG00000056647, ENSDARG00000101175, ENSDARG00000020847, ENSDARG00000033840, ENSDARG00000034600, ENSDARG00000017798,…	255	1220	14912
transcription from RNA polymerase II promoter	17	0.00959044	ENSDARG00000018260, ENSDARG00000070864, ENSDARG00000021032, ENSDARG00000014309, ENSDARG00000053301, ENSDARG00000040237, ENSDARG00000041430, ENSDARG00000036987, ENSDARG00000034195, ENSDARG00000077987, ENSDARG00000103648, ENSDARG00000009418, ENSDARG00000079613, ENSDARG00000102964, ENSDARG00000040926, ENSDARG00000043561, ENSDARG00000074319	255	488	14912
